# Supplementary material for: Genetic Control of Maize Shoot Apical Meristem Architecture
Source: PubMed Central journal article supplement (PMC4455781; doi:10.1534/g3.114.011940), 2014-05-22
Supplement: supp_g3.114.011940_FigureS1.pdf [file supp_g3.114.011940_FigureS1.pdf]

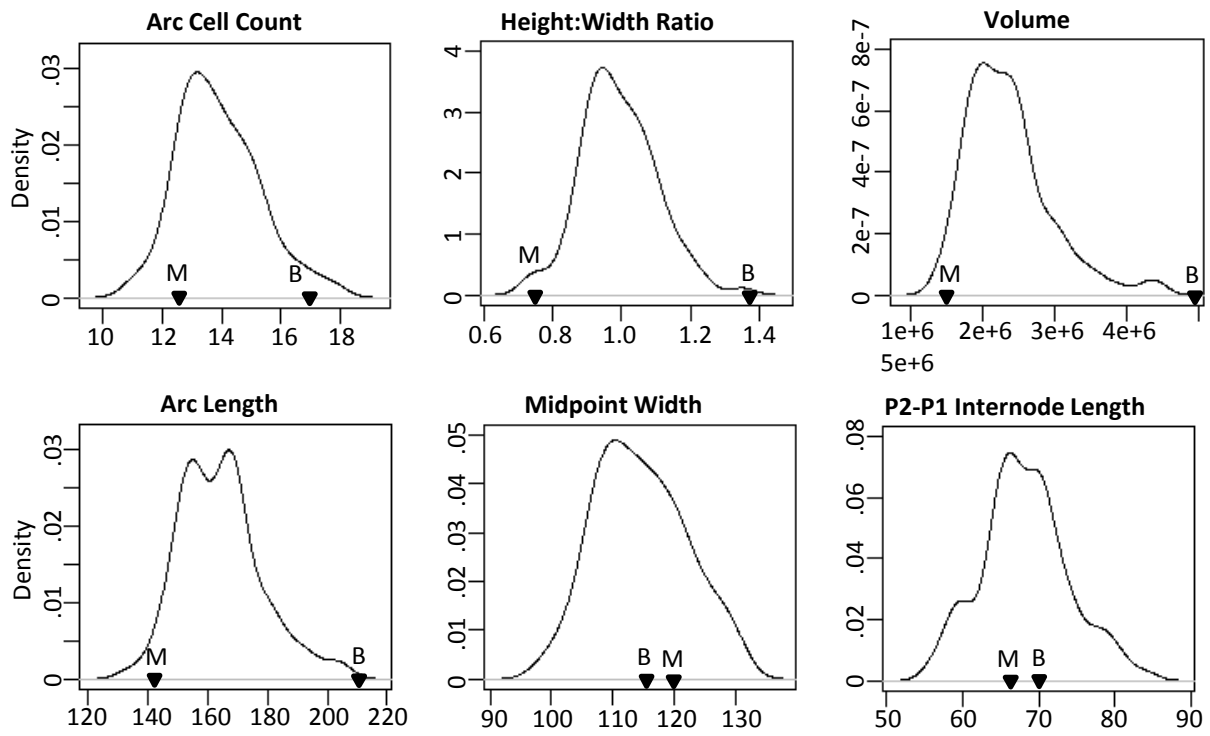

**Figure S1** Density distributions of remaining SAM traits in the IBMRIL population. B73 and Mo17 are indicated as B and M, respectively.
